# Supplementary material for: Gastrointestinal iron excretion and reversal of iron excess in a mouse model of inherited iron excess
Source: PubMed Central journal article supplement — Haematologica. 2018 Nov 8;104(4):678–89. doi: 10.3324/haematol.2018.198382 (PMC6442972; doi:10.3324/haematol.2018.198382), 2019-04
Supplement: 2018_198382-Disclosures_and_Contributions.pdf [file 2018_198382-Disclosures_and_Contributions.pdf]

Haematologica  
HAEMATOL/2018/198382  
Version 4

Gastrointestinal iron excretion and reversal of iron excess in a mouse  
model of inherited iron excess

Courtney J. Mercadante, Milankumar Prajapati, Jignesh H. Parmar,  
Heather L. Conboy, Miriam E. Dash, Michael A. Pettiglio, Carolina  
Herrera, Julia T. Bu, Edward G. Stopa, Pedro Mendes, and Thomas B.  
Bartnikas

Disclosures: none

Contributions: TBB conceived the study idea; CJM, TBB, JP, and PM established  
methodology; CJM, HLC, MP, MED, CH, MAP, and TBB performed non-modeling work; JP  
and PM performed modeling work; PM and TBB wrote the manuscript.
